# Supplementary material for: Rapid and selective recognition of Vibrio parahaemolyticus assisted by perfluorinated alkoxysilane modified molecularly imprinted polymer film
Source: Royal Society of Chemistry journal article supplement (doi:10.1039/d0ra00306a), 2020-01-01
Supplement: d0ra00306a1.pdf [file d0ra00306a1.pdf]

**Rapid and Selective recognition of *Vibrio parahaemolyticus* assisted by perfluorinated alkoxy silane modified molecularly imprinted polymer film**

Kaiyue Fu,<sup>a,b,#</sup> Huiwen Zhang,<sup>a,#</sup> Yuanyuan Guo,<sup>a</sup> Juan Li,<sup>a,\*</sup> Heran Nie,<sup>c</sup> Xiuling Song,<sup>a</sup> Kun Xu,<sup>a</sup> Juan Wang,<sup>a</sup> and Chao Zhao<sup>a,\*</sup>

<sup>a</sup> School of Public Health, Jilin University, Changchun, Jilin, 130021, PR China

<sup>b</sup> Hebi Center for Disease Control and Prevention, Hebi, Henan, 458030, PR China

<sup>c</sup> Dalian Institute of Chemical Physics, Chinese Academy of Sciences, Dalian, Liaoning, 116023, PR China

# Contributed equally.

\* Correspondence: li\_juan@jlu.edu.cn (J.L.); czhao0529@jlu.edu.cn (C.Z.)

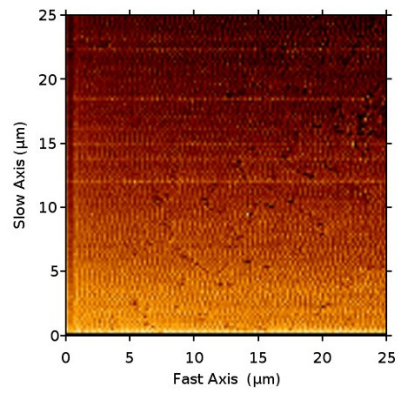

Fig. S1. AFM image of imprinted PDMS film.

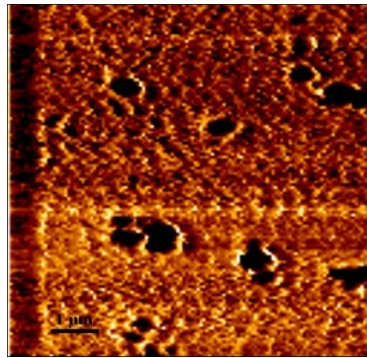

Fig. S2. AFM image of POTS-modified imprinted PDMS film.

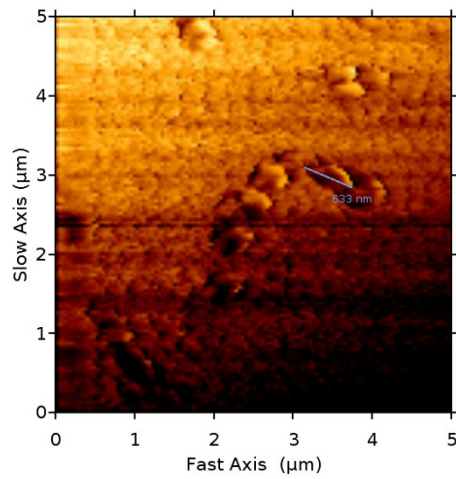

Fig. S3. AFM image of POTS-modified imprinted PDMS film captured *V. parahaemolyticus*.

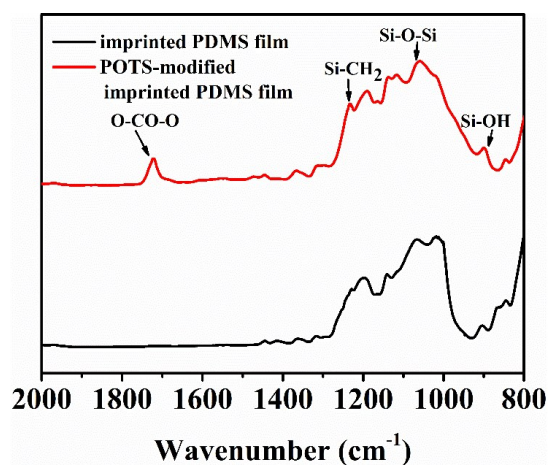

Fig. S4. ATR-IR characterization of imprinted PDMS film and POTS-modified imprinted PDMS film.

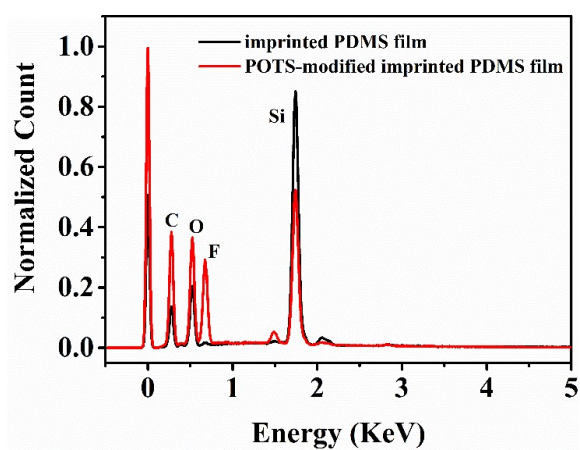

Fig. S5. SEM-EDS characterization of imprinted PDMS film and POTS-modified imprinted PDMS film.
